# Supplementary material for: Development of a novel method for the purification of C-phycocyanin pigment from a local cyanobacterial strain Limnothrix sp. NS01 and evaluation of its anticancer properties
Source: PubMed Central journal article supplement (PMC6603007; doi:10.1038/s41598-019-45905-6), 2019-07-01
Supplement: 41598_2019_45905_MOESM1_ESM.pdf [file 41598_2019_45905_MOESM1_ESM.pdf]

***Development of a novel method for the purification of C-phycoerythrin pigment from a local cyanobacterial strain Limnospira sp. NS01 and evaluation of its anticancer properties***

Mahdie Safaei<sup>1</sup>, Hadi Maleki<sup>2</sup>, Hamidreza Soleymanpour<sup>1</sup>, Amir Norouzy<sup>1</sup>, Hossein Shahbani Zahiri<sup>1</sup>, Hojatollah Vali<sup>3</sup>, Kambiz Akbari Noghabi<sup>1\*</sup>

<sup>1</sup>Department of Energy & Environmental Biotechnology, National Institute of Genetic Engineering and Biotechnology (NIGEB), P.O. Box 14155-6343 Tehran-Iran, <sup>2</sup>Department of Microbiology and Microbial Biotechnology, Faculty of Life Sciences & Biotechnology, Shahid Beheshti University, Tehran-Iran, <sup>3</sup>Facility for Electron Microscopy Research, McGill University, 3640 Street, Montreal, Quebec H3A 0C7 Canada.

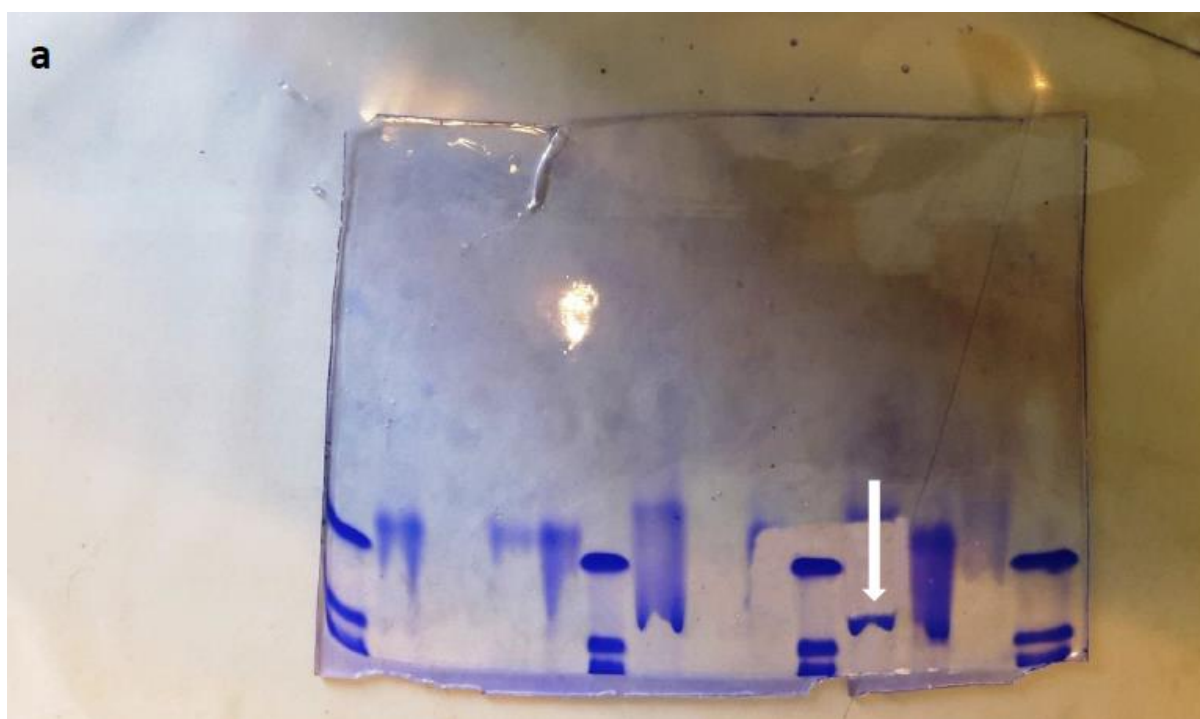

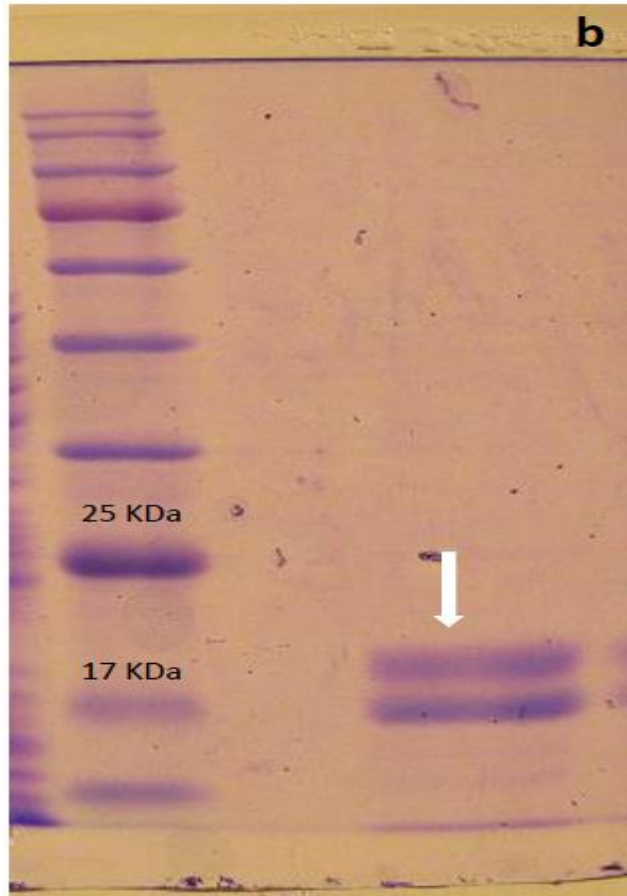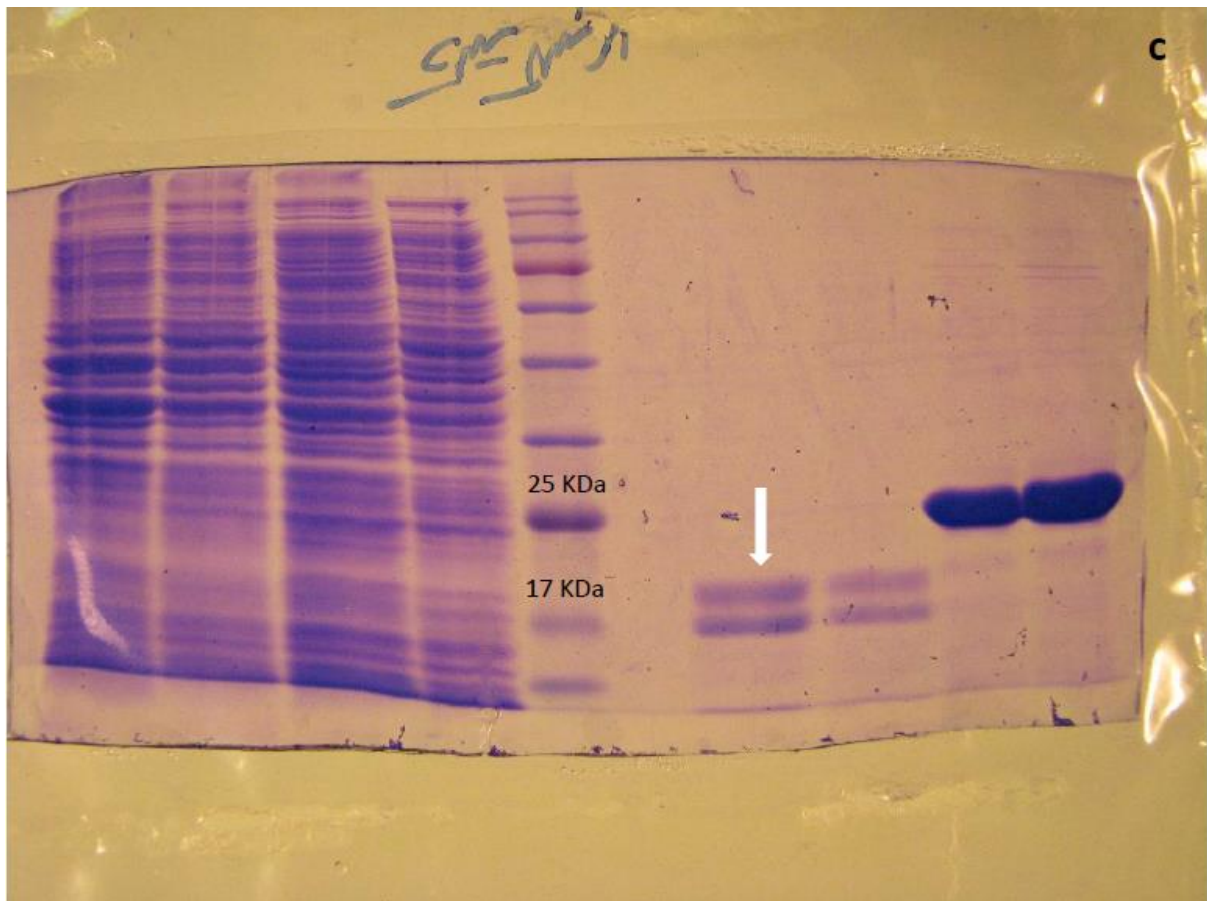

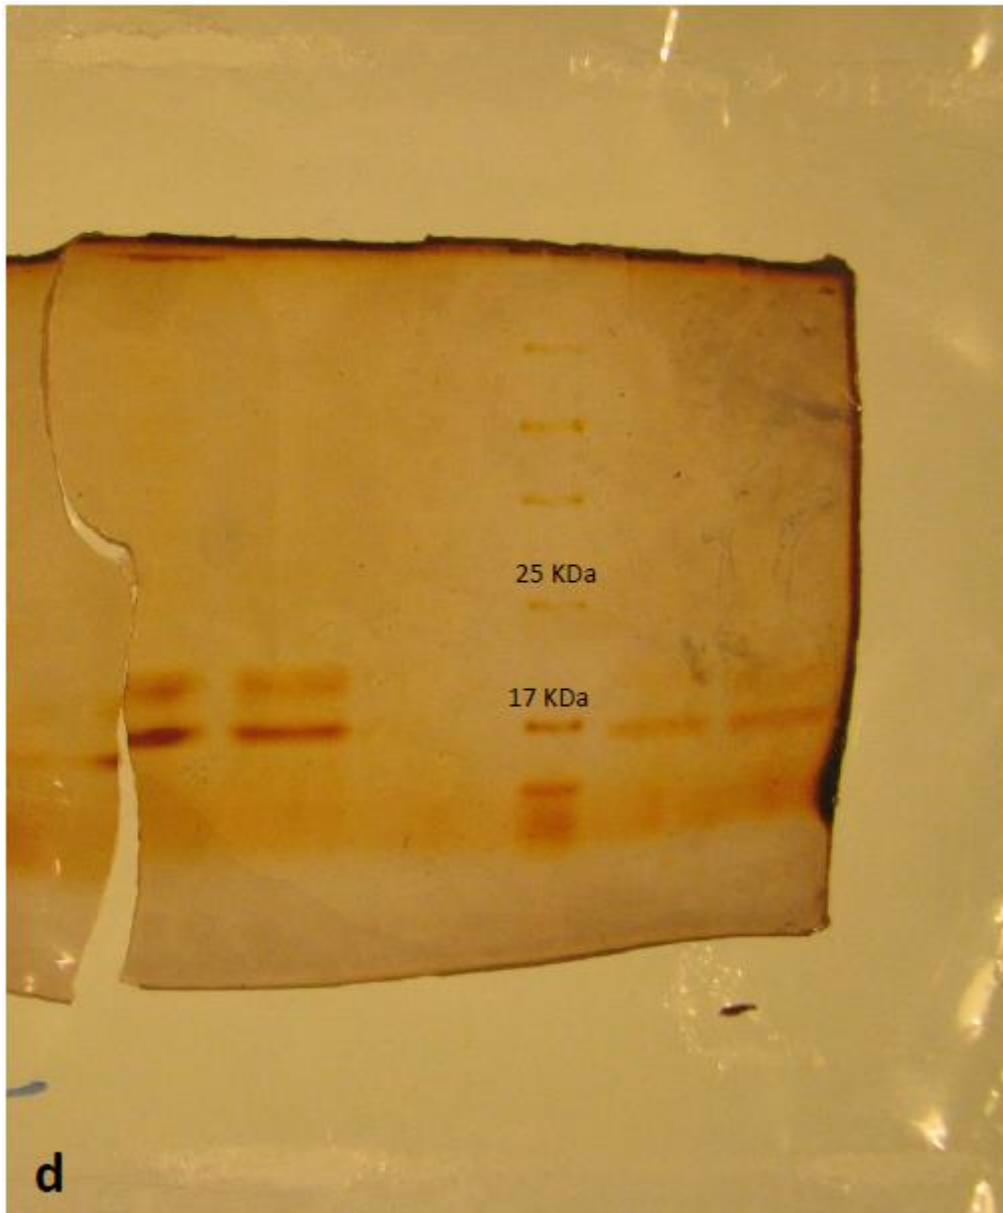

Fig. 3- Sup. Native and SDS-PAGE profiles of the purified form of C-PC from *Limnothrix* sp. NS01. a) Blue-native PAGE of bovine serum albumin (BSA) as a protein marker and single bond of the purified C-PC by Blue-native PAGE. b & c) SDS-PAGE profile of C-PC stained with Coomassie brilliant blue, having a molecular weight of about 17 and 20 kDa, related to the  $\alpha$  and  $\beta$  subunits, d) SDS-PAGE bond of C-PC stained with silver nitrate.
